# Supplementary material for: Dacostaite, K(Mg2Al)[Mg(H2O)6]2(AsO4)2F6 ⋅ 2H2O, a new fluoride–arsenate mineral from the Cetine di Cotorniano Mine (Tuscany, Italy)
Source: Copernicus journal article supplement (doi:10.5194/ejm-37-39-2025), 2025-01-20

## checkCIF/PLATON report

Structure factors have been supplied for datablock(s) shelx

THIS REPORT IS FOR GUIDANCE ONLY. IF USED AS PART OF A REVIEW PROCEDURE FOR PUBLICATION, IT SHOULD NOT REPLACE THE EXPERTISE OF AN EXPERIENCED CRYSTALLOGRAPHIC REFEREE.

No syntax errors found.      CIF dictionary      Interpreting this report

### Datablock: shelx

---

|                        |                                                                                                                                                                    |                                                                                                  |              |
|------------------------|--------------------------------------------------------------------------------------------------------------------------------------------------------------------|--------------------------------------------------------------------------------------------------|--------------|
| Bond precision:        | Mg- O = 0.0130 A                                                                                                                                                   | Wavelength=0.71073                                                                               |              |
| Cell:                  | a=12.474 (5)                                                                                                                                                       | b=7.198 (3)                                                                                      | c=13.724 (6) |
|                        | alpha=90                                                                                                                                                           | beta=99.518 (13)                                                                                 | gamma=90     |
| Temperature:           | 293 K                                                                                                                                                              |                                                                                                  |              |
|                        | Calculated                                                                                                                                                         | Reported                                                                                         |              |
| Volume                 | 1215.3 (9)                                                                                                                                                         | 1215.3 (8)                                                                                       |              |
| Space group            | C 2/m                                                                                                                                                              | C 2/m                                                                                            |              |
| Hall group             | -C 2y                                                                                                                                                              | -C 2y                                                                                            |              |
| Moiety formula         | Al <sub>3</sub> As <sub>2</sub> F <sub>6</sub> O <sub>8</sub> , 2 (Mg O <sub>6</sub> ),<br>0.105 (K <sub>4</sub> ), 1.333 (O),<br>0.333 (O <sub>2</sub> ), 0.43 (K | ?                                                                                                |              |
| Sum formula            | Al <sub>3</sub> As <sub>2</sub> F <sub>6</sub> K <sub>0.85</sub> Mg <sub>2</sub> O <sub>22</sub>                                                                   | Al <sub>3</sub> As <sub>2</sub> F <sub>6</sub> K <sub>0.85</sub> Mg <sub>2</sub> O <sub>22</sub> |              |
| Mr                     | 778.56                                                                                                                                                             | 778.56                                                                                           |              |
| Dx, g cm <sup>-3</sup> | 2.128                                                                                                                                                              | 2.128                                                                                            |              |
| Z                      | 2                                                                                                                                                                  | 2                                                                                                |              |
| Mu (mm <sup>-1</sup> ) | 3.188                                                                                                                                                              | 3.188                                                                                            |              |
| F <sub>000</sub>       | 750.2                                                                                                                                                              | 750.2                                                                                            |              |
| F <sub>000</sub> '     | 751.88                                                                                                                                                             |                                                                                                  |              |
| h, k, lmax             | 15, 8, 17                                                                                                                                                          | 15, 8, 17                                                                                        |              |
| Nref                   | 1333                                                                                                                                                               | 1325                                                                                             |              |
| Tmin, Tmax             | 0.858, 0.938                                                                                                                                                       | 0.857, 0.938                                                                                     |              |
| Tmin'                  | 0.800                                                                                                                                                              |                                                                                                  |              |

Correction method= # Reported T Limits: Tmin=0.857 Tmax=0.938  
AbsCorr = MULTI-SCAN

Data completeness= 0.994

Theta (max)= 26.364

R(reflections)= 0.0927( 1022)

wR2(reflections)=  
0.2574( 1325)

S = 1.055

Npar= 102

---

The following ALERTS were generated. Each ALERT has the format

**test-name\_ALERT\_alert-type\_alert-level.**

Click on the hyperlinks for more details of the test.

---

### Alert level A

PLAT975\_ALERT\_2\_A Check Calcd Resid. Dens. 0.78Ang From Ow3 . 2.49 eA-3

---

### Alert level B

PLAT975\_ALERT\_2\_B Check Calcd Resid. Dens. 0.87Ang From Ow3 . 1.92 eA-3

---

### Alert level C

DIFMX02\_ALERT\_1\_C The maximum difference density is > 0.1\*ZMAX\*0.75

The relevant atom site should be identified.

PLAT077\_ALERT\_4\_C Unitcell Contains Non-integer Number of Atoms .. Please Check  
PLAT084\_ALERT\_3\_C High wR2 Value (i.e. > 0.25) ..... 0.26 Report  
PLAT097\_ALERT\_2\_C Large Reported Max. (Positive) Residual Density 2.53 eA-3  
PLAT244\_ALERT\_4\_C Low 'Solvent' Ueq as Compared to Neighbors of Mg3 Check  
PLAT250\_ALERT\_2\_C Large U3/U1 Ratio for <U(i,j)> Tensor(Resd 1) 2.6 Note  
PLAT431\_ALERT\_2\_C Short Inter HL..A Contact F4 ..Ow3 . 2.82 Ang.

x,y,z = 1\_555 Check

PLAT911\_ALERT\_3\_C Missing FCF Refl Between Thmin & STh/L= 0.600 7 Report  
-9 3 3, 6 0 6, 6 0 8, 6 0 9, -6 0 10, 6 0 11,  
0 0 13,

PLAT971\_ALERT\_2\_C Check Calcd Resid. Dens. 0.78Ang From Ow3 2.49 eA-3  
PLAT971\_ALERT\_2\_C Check Calcd Resid. Dens. 1.03Ang From As1 2.25 eA-3  
PLAT971\_ALERT\_2\_C Check Calcd Resid. Dens. 0.77Ang From O3 2.09 eA-3  
PLAT971\_ALERT\_2\_C Check Calcd Resid. Dens. 0.87Ang From Ow3 1.92 eA-3  
PLAT971\_ALERT\_2\_C Check Calcd Resid. Dens. 0.94Ang From K2 1.64 eA-3  
PLAT973\_ALERT\_2\_C Check Calcd Positive Resid. Density on M1 1.31 eA-3  
PLAT973\_ALERT\_2\_C Check Calcd Positive Resid. Density on M2 1.25 eA-3  
PLAT975\_ALERT\_2\_C Check Calcd Resid. Dens. 0.97Ang From Ow4 . 1.05 eA-3  
PLAT975\_ALERT\_2\_C Check Calcd Resid. Dens. 0.70Ang From Ow3 . 1.02 eA-3  
PLAT975\_ALERT\_2\_C Check Calcd Resid. Dens. 0.62Ang From Ow3 . 1.02 eA-3  
PLAT975\_ALERT\_2\_C Check Calcd Resid. Dens. 0.96Ang From Ow3 . 1.01 eA-3  
PLAT975\_ALERT\_2\_C Check Calcd Resid. Dens. 0.95Ang From Ow2 . 0.90 eA-3

---

### Alert level G

PLAT004\_ALERT\_5\_G Polymeric Structure Found with Maximum Dimension 3 Info  
PLAT017\_ALERT\_1\_G Check Scattering Type Consistency of M1 as AL  
PLAT017\_ALERT\_1\_G Check Scattering Type Consistency of M2 as AL  
PLAT066\_ALERT\_1\_G Predicted and Reported Tmin&Tmax Range Identical ? Check  
PLAT083\_ALERT\_2\_G SHELXL Second Parameter in WGHT Unusually Large 24.32 Why ?  
PLAT171\_ALERT\_4\_G The CIF-Embedded .res File Contains EADP Records 2 Report  
PLAT199\_ALERT\_1\_G Reported \_cell\_measurement\_temperature ..... (K) 293 Check  
PLAT200\_ALERT\_1\_G Reported \_diffn\_ambient\_temperature ..... (K) 293 Check  
PLAT300\_ALERT\_4\_G Atom Site Occupancy of Ow5A Constrained at 0.3333 Check

|                   |                                                             |                |              |       |
|-------------------|-------------------------------------------------------------|----------------|--------------|-------|
| PLAT300_ALERT_4_G | Atom Site Occupancy of Ow5B                                 | Constrained at | 0.3333       | Check |
| PLAT300_ALERT_4_G | Atom Site Occupancy of Ow5C                                 | Constrained at | 0.1667       | Check |
| PLAT302_ALERT_4_G | Anion/Solvent/Minor-Residue Disorder (Resd 3)               |                | 100%         | Note  |
| PLAT302_ALERT_4_G | Anion/Solvent/Minor-Residue Disorder (Resd 4)               |                | 100%         | Note  |
| PLAT302_ALERT_4_G | Anion/Solvent/Minor-Residue Disorder (Resd 5)               |                | 100%         | Note  |
| PLAT302_ALERT_4_G | Anion/Solvent/Minor-Residue Disorder (Resd 6)               |                | 100%         | Note  |
| PLAT720_ALERT_4_G | Number of Unusual/Non-Standard Labels .....                 |                | 9            | Note  |
|                   | M1 M2 Ow1 Ow2 Ow3 Ow4 Ow5A Ow5B                             |                |              |       |
|                   | Ow5C                                                        |                |              |       |
| PLAT883_ALERT_1_G | No Info/Value for _atom_sites_solution_primary .            |                | Please Do !  |       |
| PLAT899_ALERT_4_G | SHELXL2018 is Deprecated and Succeeded by SHELXL            |                | 2019/3       | Note  |
| PLAT910_ALERT_3_G | Missing # of FCF Reflection(s) Below Theta(Min).            |                | 1            | Note  |
|                   | 0 0 1,                                                      |                |              |       |
| PLAT912_ALERT_4_G | Missing # of FCF Reflections Above STh/L= 0.600             |                | 1            | Note  |
| PLAT933_ALERT_2_G | Number of HKL-OMIT Records in Embedded .res File            |                | 1            | Note  |
|                   | -9 3 3,                                                     |                |              |       |
| PLAT965_ALERT_2_G | The SHELXL WEIGHT Optimisation has not Converged            |                | Please Check |       |
| PLAT969_ALERT_5_G | The 'Henn et al.' R-Factor-gap value .....                  |                | 2.37         | Note  |
|                   | Predicted wR2: Based on SigI**2 10.88 or SHELX Weight 25.39 |                |              |       |

- 
- 1 **ALERT level A** = Most likely a serious problem - resolve or explain  
 1 **ALERT level B** = A potentially serious problem, consider carefully  
 20 **ALERT level C** = Check. Ensure it is not caused by an omission or oversight  
 23 **ALERT level G** = General information/check it is not something unexpected
- 7 ALERT type 1 CIF construction/syntax error, inconsistent or missing data  
 20 ALERT type 2 Indicator that the structure model may be wrong or deficient  
 3 ALERT type 3 Indicator that the structure quality may be low  
 13 ALERT type 4 Improvement, methodology, query or suggestion  
 2 ALERT type 5 Informative message, check
-

It is advisable to attempt to resolve as many as possible of the alerts in all categories. Often the minor alerts point to easily fixed oversights, errors and omissions in your CIF or refinement strategy, so attention to these fine details can be worthwhile. In order to resolve some of the more serious problems it may be necessary to carry out additional measurements or structure refinements. However, the purpose of your study may justify the reported deviations and the more serious of these should normally be commented upon in the discussion or experimental section of a paper or in the "special\_details" fields of the CIF. checkCIF was carefully designed to identify outliers and unusual parameters, but every test has its limitations and alerts that are not important in a particular case may appear. Conversely, the absence of alerts does not guarantee there are no aspects of the results needing attention. It is up to the individual to critically assess their own results and, if necessary, seek expert advice.

### **Publication of your CIF in IUCr journals**

A basic structural check has been run on your CIF. These basic checks will be run on all CIFs submitted for publication in IUCr journals (*Acta Crystallographica*, *Journal of Applied Crystallography*, *Journal of Synchrotron Radiation*); however, if you intend to submit to *Acta Crystallographica Section C* or *E* or *IUCrData*, you should make sure that full publication checks are run on the final version of your CIF prior to submission.

### **Publication of your CIF in other journals**

Please refer to the *Notes for Authors* of the relevant journal for any special instructions relating to CIF submission.

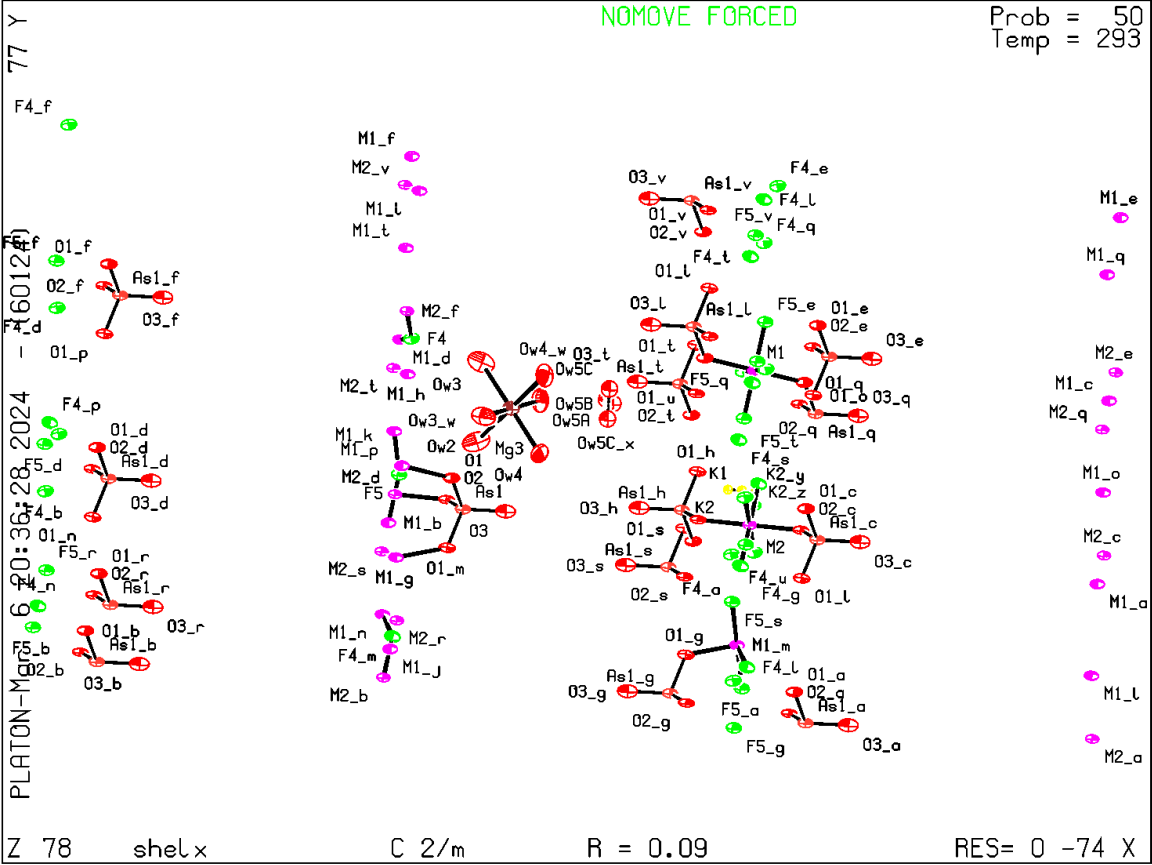

Supplement: Supplementary file 3 [file ejm-37-39-2025-supplement.zip]
