# Supplementary material for: Dacostaite, K(Mg2Al)[Mg(H2O)6]2(AsO4)2F6 ⋅ 2H2O, a new fluoride–arsenate mineral from the Cetine di Cotorniano Mine (Tuscany, Italy)
Source: Copernicus journal article supplement (doi:10.5194/ejm-37-39-2025), 2025-01-20
Supplement: Supplementary file 1 [file ejm-37-39-2025-supplement.zip]

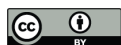

*Supplement of*

**Dacostaite,  $\text{K}(\text{Mg}_2\text{Al})[\text{Mg}(\text{H}_2\text{O})_6]_2(\text{AsO}_4)_2\text{F}_6 \cdot 2\text{H}_2\text{O}$ , a new fluoride–arsenate mineral from the Cetine di Cotorniano Mine (Tuscany, Italy)**

**Cristian Biagioni et al.**

*Correspondence to:* Cristian Biagioni ([cristian.biagioni@unipi.it](mailto:cristian.biagioni@unipi.it))

- [ejm-37-39-2025-supplement-title-page.pdf](#)
- Supplementary Material
  - [2024-015\\_DACOSTAITE.cif](#)
  - [2024-015\\_DACOSTAITE\\_ALett.pdf](#)
  - [2024-015\\_DACOSTAITE\\_checkcif.pdf](#)

The copyright of individual parts of the supplement might differ from the article licence.
